# Supplementary material for: Graphemic-phonetic diachronic linguistic invariance of the frequency and of the Index of Coincidence as cryptanalytic tools
Source: PLoS One. 2019 Mar 19;14(3):e0213710. doi: 10.1371/journal.pone.0213710 (PMC6424454; doi:10.1371/journal.pone.0213710)
Supplement: S5 File — (XLSX) [file pone.0213710.s005.xlsx]

## Sheet: Fig2-fr.latin-graf
1
2																																								a	b	c	d	e	f	g	h	i	j
3																																							MAX	10.088	1.98461	4.69552	4.66801	14.0157	1.46735	1.65077	1.06383	12.9085	0.278253
4																																							min	6.67341	0.77036	3.19446	2.22762	9.97799	0.757576	0.612272	0.567031	9.58904	0
5
6
7
8
9
10
11																																			PERCENTAGE		UNITS
12
13
14
15																																				MAX		MIN
16
17
18
19
20
21
22
23
24
25
26
27
[truncated: 17 more columns]

## Sheet: Fig5-fr.latin-fon
1
2																																								1	2	3	4	5	6	7	8	9	10
3																																							MAX	10.077	13.9544	0.254712	12.868	6.6689	8.24661	1.95219	4.64142	1.53903	1.28252
4																																							min	6.63539	9.96702	0	9.81687	4.18327	5.09424	0.769513	2.19124	0.768619	0.530082
5
6
7
8
9
10
11																																			PERCENTAGE		UNITS
12
13
14
15																																				MAX		MIN
16
17
18
19
20
21
22
23
24
25
26
27
[truncated: 14 more columns]

## Sheet: Fig8-esp.graf
1
2																																								1	2	3	4	5	6	7	8	9	10
3																																							MAX	14.6164	2.1164	3.99937	5.82313	16.4371	1.34153	1.76871	1.46063	7.35606	0.764895
4																																							min	10.7245	0.736342	2.12245	3.53836	11.9048	0.422705	0.889624	0.257127	4.4795	0.0335383
5
6
7
8
9
10
11																																			PERCENTAGE		UNITS
12
13
14
15																																				MAX		MIN
16
17
18
19
20
21
22
23
24
25
26
27
[truncated: 16 more columns]

## Sheet: Fig11-esp.fon
1
2																																							1	2	3	4	5	6	7	8	9	10	11
3																																						MAX	15.0034	16.8616	8.02216	10.799	4.06606	3.05704	6.15511	1.34847	1.28104	4.95858	5.68322
4																																						min	11.0015	12.22	4.98253	8.26739	2.67446	1.88556	4.10726	0.430858	0.636028	2.74928	3.68349
5
6
7
8
9
10
11																																			PERCENTAGE		UNITS
12
13
14
15																																				MAX		MIN
16
17
18
19
20
21
22
23
24
25
26
27
[truncated: 16 more columns]
